# Supplementary material
Source: MDPI journal article supplement (https://www.mdpi.com/2073-4441/14/15/2446)
Supplement: s1 [file s1]

# **Efficient removal of organic matters from biotreated coking wastewater by coagulation combined with sludge-based activated carbon adsorption**

**Yu Xia \*, Weijia Li, Xuwen He, Dannuo Liu, Yichen Sun, Jie Chang and Jing Liu**

School of Chemical and Environmental Engineering, China University of Mining and Technology (Beijing), Beijing 100083, China

\* Correspondence: xiayu@cumtb.edu.cn

## Supplementary

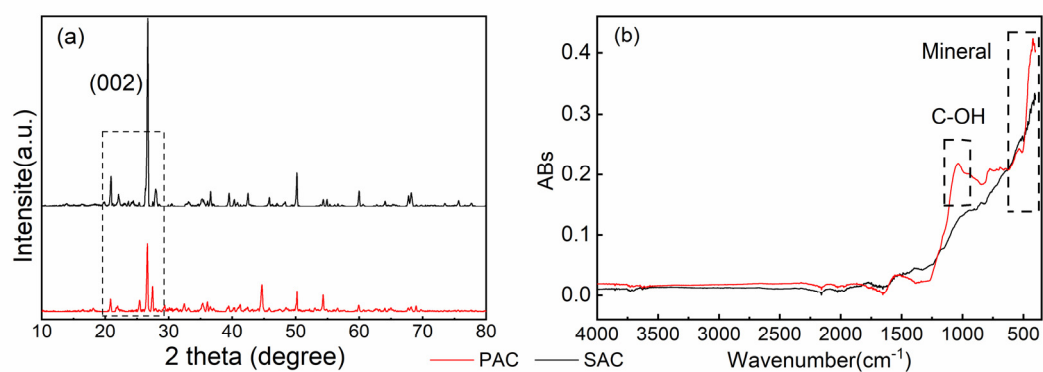

**Figure S1.** (a) XRD patterns of SAC and PAC, (b) infrared spectrograms of SAC and PAC.

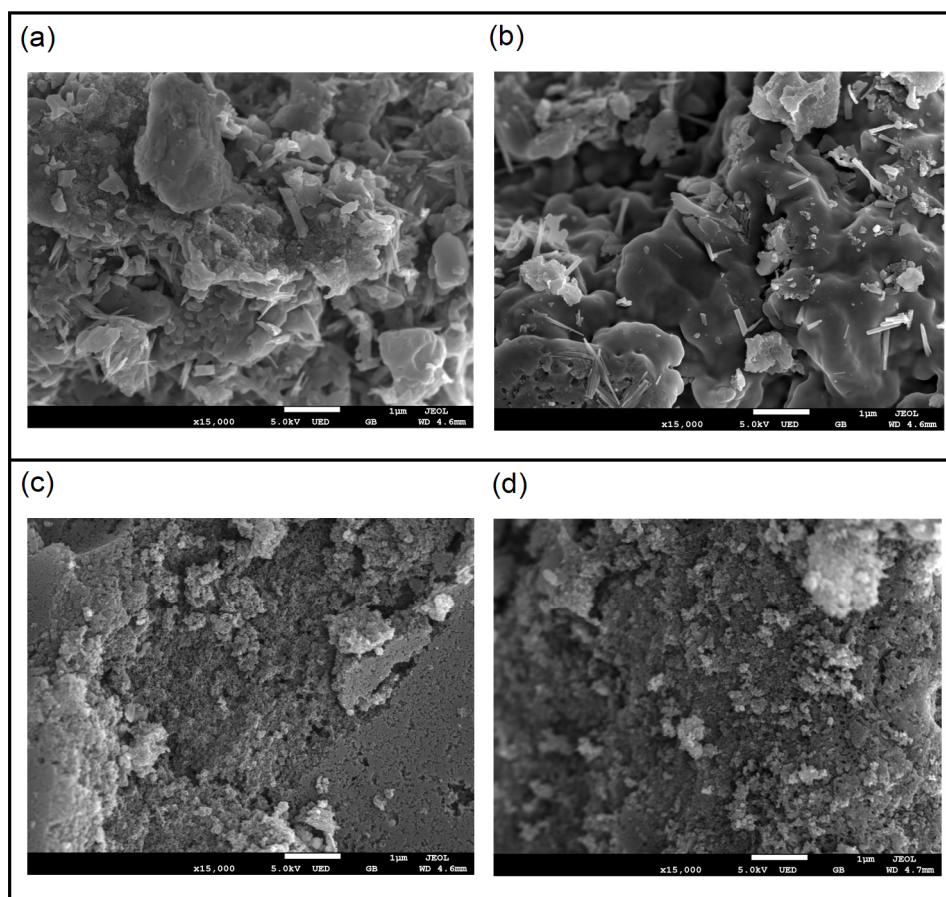

**Figure S2.** (a-b) SEM images of SAC before and after adsorption, respectively, (c-d) SEM images of PAC before and after adsorption, respectively.

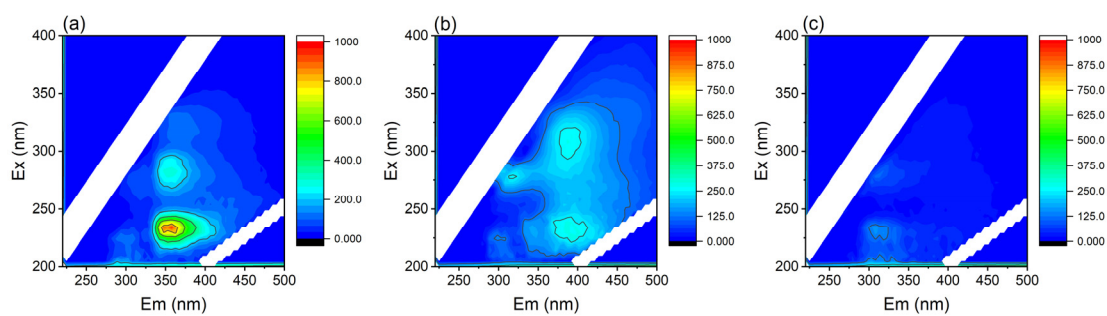

**Figure S3.** 3D-EEM spectra of raw wastewater after DOM fractionation. (a) raw wastewater (DOM1), (b) the effluent from XAD-8 (DOM2), (c) the effluent from XAD-4 (DOM3).

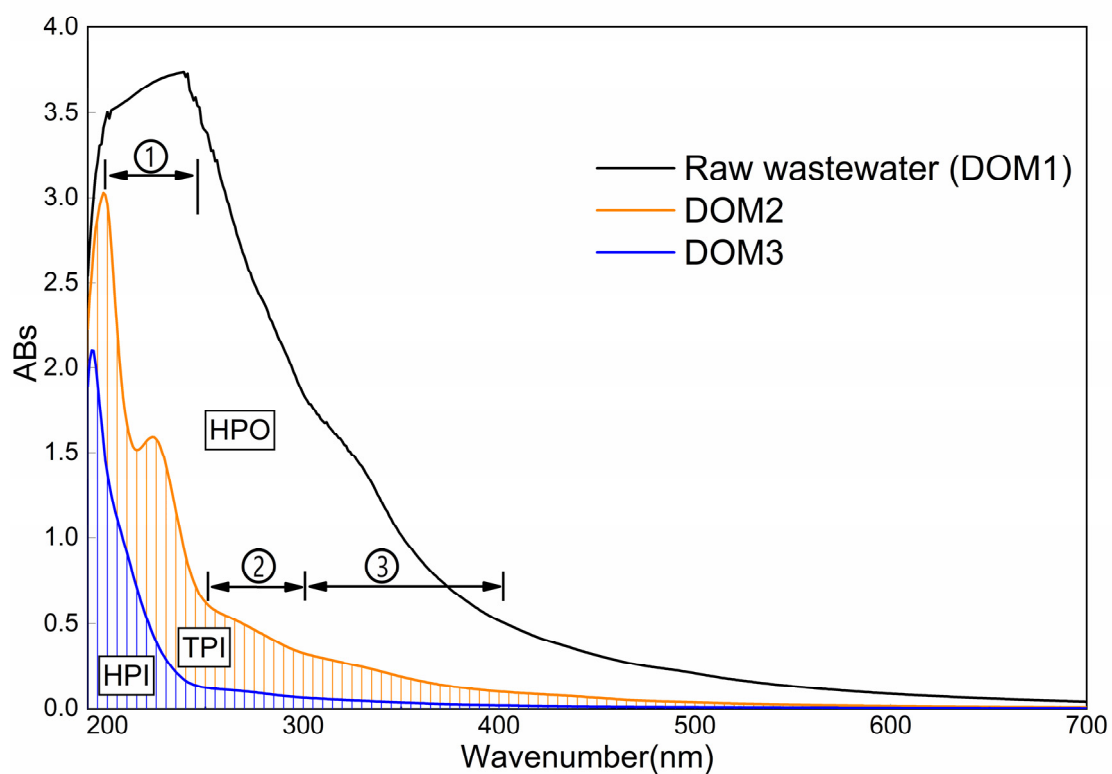

**Figure S4.** UV-vis spectra of raw wastewater after DOM fractionation. ①200nm-250nm; ②250nm-300nm; ③300nm-400nm.
